# Supplementary material
Source: PubMed Central journal article supplement (PMC6800652)

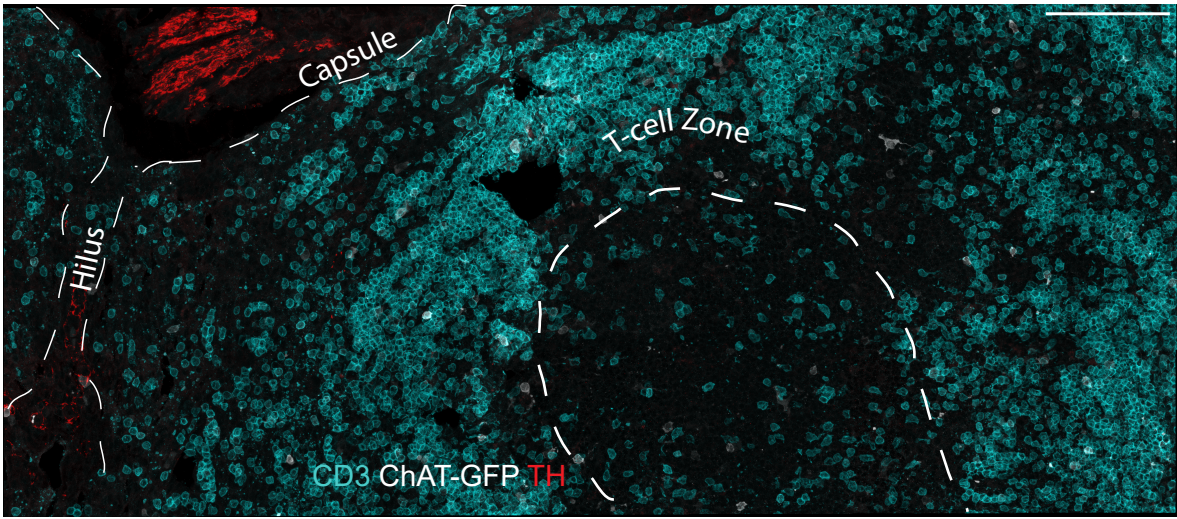

Supplement: NIHMS1538360-supplement-3.pdf [file NIHMS1538360-supplement-3.pdf]
